# Supplementary material
Source: Springer Nature journal article supplement (https://www.springermedizin.de/resource/supplementary/12958_2011_868_MOESM5_ESM.pdf/9569056)

A

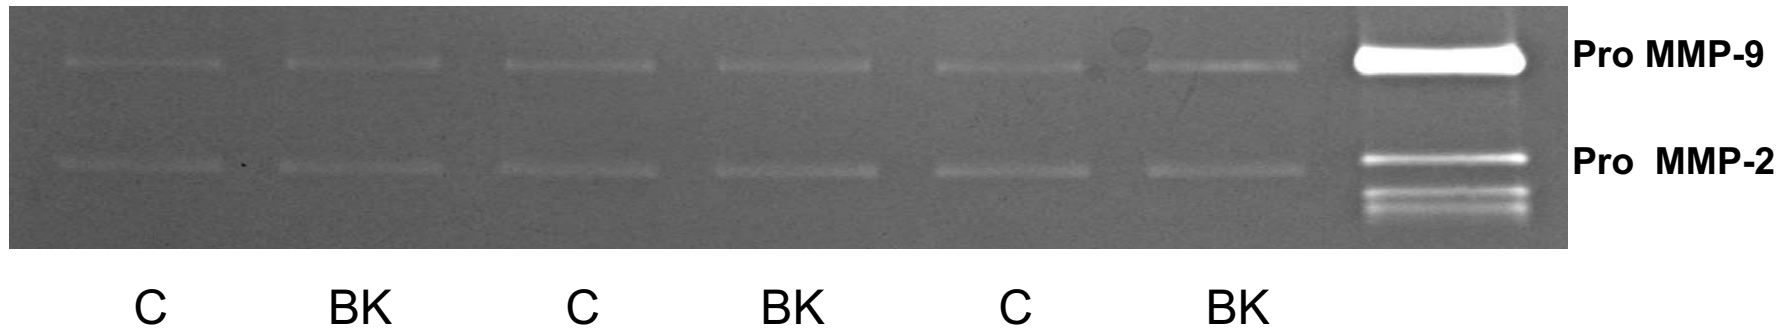

B

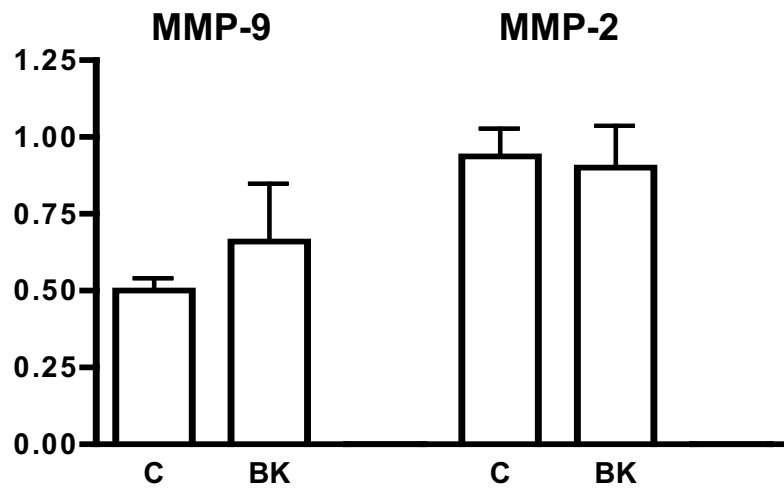

Supplement: MOESM5 [file 9569056]
